# Supplementary material for: Improving communication between the general practitioner and the oncologist: a key role in coordinating care for patients suffering from cancer
Source: Springer Nature journal article supplement (doi:10.1186/s12885-020-06993-0), 2020-06-01
Supplement: MOESM1 [file 18042076]

"Point de vue des patients sur la place de leur médecin généraliste dans la prise en charge en oncologie"

*Dans le cadre de mon mémoire de fin d'étude de médecine, je m'intéresse à votre point de vue sur la place que vous donnez à votre médecin généraliste dans le cadre de votre prise en charge actuelle.*

Vous êtes..... un homme  une femme

Qu'elle est votre âge ? : . . . . . ans

**Vous et votre médecin généraliste**

- o Avez-vous un médecin généraliste ?.....OUI  NON
- o Depuis combien de temps ? (années)..... 0-5  5-15  15 et +
- o Avez-vous changé de médecin généraliste depuis le début de la prise en charge de votre maladie ?..... OUI  NON
- o Quand avez vous vu votre médecin généraliste pour la dernière fois :
  - moins d'un mois.....OUI  NON
  - entre 1 et 3 mois.....OUI  NON
  - entre 3 et 6 mois.....OUI  NON
  - 6 mois ou plus.....OUI  NON

**Votre maladie et votre médecin généraliste**

- o Depuis combien de temps le diagnostic initial de cancer a-t-il été posé ?...0-1 an  1 an et plus
- o Votre médecin généraliste a-t-il participé au diagnostic..... OUI  NON
- o La dernière fois que vous avez vu votre médecin généraliste, était ce en lien avec votre maladie ?..... OUI  NON
- o Pensez vous que votre médecin généraliste ait des connaissances sur votre maladie ?.....OUI  NON
- o Pensez vous qu'il reçoive régulièrement des informations concernant votre prise en charge à l'Oncopole ?.....OUI  NON
- o Pensez vous qu'il soit au courant du dernier changement de traitement ?.....OUI  NON  Pas de changement

Dans quelles situations consultez-vous votre médecin généraliste ?

o Consultez-vous votre médecin généraliste pour :

- vous conseiller sur les différentes possibilités de traitement de votre maladie ?...OUI  NON
- les effets indésirables du traitement ?.....OUI  NON
- les éventuelles complications de la maladie ?.....OUI  NON
- pour soulager la douleur ?.....OUI  NON

Lors de l'urgence

o En cas d'urgence vous vous tournerez en priorité vers :

- votre médecin généraliste.....OUI  NON
  - les urgences.....OUI  NON
  - l'Oncopole.....OUI  NON
- o Pensez vous que votre médecin généraliste serait disponible en cas d'urgence..OUI  NON
- o En cas d'urgence, pensez vous que votre médecin généraliste pourrait vous prendre en charge.....OUI  NON

Votre médecin généraliste et votre oncologue

- o Estimez vous que la communication entre votre oncologue et votre médecin généraliste est satisfaisante.....OUI  NON
- o Estimez vous que l'avis de votre médecin généraliste ait déjà été pris en compte dans les décisions médicales vous concernant.....OUI  NON
- o Votre oncologue a-t-il évoqué le rôle de votre médecin généraliste dans votre prise en charge.....OUI  NON

Quel rôle donnez-vous à votre médecin généraliste au sujet de votre maladie ?

.....

.....

.....

.....

*Merci beaucoup d'avoir participé à ce questionnaire, Vladimir Druel,*

*Interne des hôpitaux de Toulouse*
