# Supplementary material for: Improving communication between the general practitioner and the oncologist: a key role in coordinating care for patients suffering from cancer
Source: Springer Nature journal article supplement (doi:10.1186/s12885-020-06993-0), 2020-06-01
Supplement: MOESM2 [file 18042076]

" Patients' perspective on the role of their general practitioner in cancer management "

You are..... a man  a woman

What is your age? ..... years

You and your general practitioner

- Do you have a general practitioner? ..... YES  NO
- How long have you been with this doctor? (years) ..... 0-5  5-15  15 and +
- Have you changed your general practitioner since starting treatment for your disease? ..... YES  NO
- When did you last visit your general practitioner:
  - Less than a month ago ..... YES  NO
  - 1 to 3 months ago ..... YES  NO
  - 4 to 6 months ago ..... YES  NO
  - 6 months ago or more ..... YES  NO

Your illness and your general practitioner

- How long ago was the cancer first diagnosed? .....0-1 year  1 year or more
- Did your general practitioner take part in the diagnosis? ..... YES  NO
- The last time you visited your general practitioner, was the visit related to your disease? ..... YES  NO
- Do you think that your general practitioner has good knowledge about your disease? ..... YES  NO
- Do you think that he/she regularly receives information about your treatment at the specialized cancer center? ..... YES  NO
- Do you think that he/she knows about the most recent change in your treatment..... YES  NO  No change in treatment

**In what circumstances do you consult your general practitioner?**

o Do you consult your general practitioner about:

- advice on the treatment possibilities for your disease? ..... YES  NO
- adverse effects of treatment? ..... YES  NO
- complications, if any, of the disease? ..... YES  NO
- pain relief? ..... YES  NO

**In an emergency**

o In an emergency, would you first turn to:

- your general practitioner..... YES  NO
- emergency department ..... YES  NO
- specialized cancer center ..... YES  NO

o Do you think that your general practitioner would be available in an emergency? ..... YES  NO

o In an emergency, do you think that your general practitioner can care for you? ..... YES  NO

**Your general practitioner and your oncologist**

o Do you think that communication between your oncologist and your general practitioner is satisfactory? ..... YES  NO

o Do you think that your general practitioner's opinion has already been taken into account in medical decisions about your case? ..... YES  NO

o Has your oncologist talked about your general practitioner's role in your care ? ..... YES  NO

What do you think is your general practitioner's role in relation to your disease?

.....  
.....  
.....  
.....

*Thank you for taking the time to complete this questionnairequestionnaire, Vladimir Druel,*

*Interne des hôpitaux de Toulouse*
